1 **Title: Characteristic variables of acute ischemic stroke categorized according to body**  
2 **mass index classifications**

3 **Running Title: Acute Ischemic Stroke and Body Mass Index**

4 Joe Senda, MD, PhD<sup>1,2</sup>; Yoshinobu Amakusa, MD<sup>1,3</sup>; Tomoki Hirunagi, MD, PhD<sup>1,3</sup>; Ruido  
5 Ida, MD<sup>2,4</sup>; Hidenori Muro, MD, PhD<sup>2</sup>; Takahito Otani, PhD<sup>5</sup>; Hiroko Nakagawa-Senda,  
6 MD, PhD, MPH<sup>5</sup>; Takehiro Naito, MD, PhD<sup>6</sup>; Takenori Kato, MD, PhD<sup>6</sup>; Toshinori  
7 Hasegawa, MD, PhD<sup>6</sup>; Katsuhiro Kawaguchi, MD, PhD<sup>7</sup>; and Masahisa Katsuno, MD,  
8 PhD<sup>3</sup>.

9 <sup>1</sup>Department of Neurology, Komaki City Hospital, Komaki, Japan.  
10 TEL: +81-568-76-4131.

11 <sup>2</sup>Department of Rehabilitation, Komaki City Hospital, Komaki, Japan.  
12 TEL: +81-568-76-4131.

13 <sup>3</sup>Department of Neurology, Nagoya University Graduate School of Medicine, Nagoya,  
14 Japan. TEL: +81-52-744-2391.

15 <sup>4</sup>Department of Rehabilitation Medicine, Nagoya City University Graduate School of  
16 Medical Sciences, Nagoya, Japan. TEL: +81-52-853-8733.

17 <sup>5</sup>Department of Public Health, Nagoya City University Graduate School of Medical  
18 Sciences, Nagoya, Japan. TEL: +81-52-853-8176.

19 <sup>6</sup>Department of Neurosurgery, Komaki City Hospital, Komaki, Japan.  
20 TEL: +81-568-76-4131.

21 <sup>7</sup>Department of Cardiology, Komaki City Hospital, Komaki, Japan.  
22 TEL: +81-568-76-4131.

1 **Address correspondence to:**

2 Joe Senda, MD, PhD.

3 Department of Neurology and Rehabilitation, Komaki city hospital, 1-20 Jyoubushi

4 Komaki 485-8520, Japan. TEL: +81-568-76-4131.

5 E-mail: senda1@med.nagoya-u.ac.jp

6 **Other authors' E-mail address:**

7 Yoshinobu Amakusa: amakusa.med.758@gmail.com

8 Tomoki Hirunagi: to-hiru@hotmail.co.jp

9 Takahito Otani: otani@med.nagoya-cu.ac.jp

10 Hiroko Nakagawa-Senda: nakagawa@med.nagoya-cu.ac.jp

11 Ruido Ida: world21requiem@hotmail.com

12 Hidenori Muro: httmrcz@gmail.com

13 Takehiro Naito: tnaito2004@yahoo.co.jp

14 Takenori Kato: neuro.kato@gmail.com

15 Toshinori Hasegawa: h-toshi@komakihp.gr.jp

16 Katsuhiro Kawaguchi: kawa@komakihp.gr.jp

17 Masahisa Katsuno: ka2no@med.nagoya-u.ac.jp

18 **List of contents:** Abstract: 250 words, Text: 5948 words (including tables, figure legends,

19 and references), Title: 13 words / 106 characters, 1 figure, 2 tables, 40 references.

1 **Abstract**

2 **BACKGROUND:** We investigated the characteristic variables of acute ischemic stroke  
3 categorized according to body mass index (BMI).

4 **METHODS:** From a registry of 1676 consecutive acute ischemic stroke cases, 965 cases  
5 (622 men and 434 women; mean age  $71.53 \pm 12.42$  years) were selected based on eligibility  
6 criteria. These participants were divided into four cohorts according to BMI classifications:  
7 BMI < 18 (underweight),  $18.5 \leq \text{BMI} < 25$  (normal weight),  $25 \leq \text{BMI} < 30$  (overweight),  
8 and BMI  $\geq 30$  (obese). To avoid bias, propensity score analyses were performed; the  
9 confounding variables of sex and age were adjusted.

10 **RESULTS:** The underweight cohort (n = 82) had an older, largely female population. The  
11 overweight (n = 212) and obese cohorts (n = 48) had younger populations. The analyses  
12 revealed no significant differences in neurological outcomes among the four cohorts.  
13 Furthermore, higher risks of hyperlipidemia, dyslipidemia, and diabetes mellitus were  
14 associated with the higher BMI cohorts in participants with acute ischemic stroke. Findings  
15 revealed higher rates of usage of antidiabetic and antidyslipidemic medications in the  
16 overweight cohort (p = 0.007, p = 0.003; respectively) and raised values of triglycerides,  
17 low-density lipoprotein cholesterol, and glycated hemoglobin in the obese cohort (p = 0.044,  
18 p = 0.019, p < 0.001; respectively) than in the normal weight cohort. By contrast, the lower  
19 BMI cohort (underweight) did not have hyperlipidemia.

20 **CONCLUSIONS:** The importance of focusing on the management of dyslipidemia,  
21 hyperlipidemia, and hyperglycemia for acute ischemic stroke in patients who are  
22 overweight or obese has been highlighted.

- 1 **Key words:** Body Mass Index, dyslipidemias, hyperlipidemias, ischemic stroke,
- 2 overweight.

## 1 INTRODUCTION

2 Obesity is an important risk factor associated with a greater incidence of stroke <sup>1,2</sup>. Body  
3 mass index (BMI) is widely used as an index of obesity derived from the variables of body  
4 weight and height. <sup>3</sup>. According to a previous meta-analysis <sup>4</sup>, the risk of stroke is positively  
5 correlated with BMI, and this correlation is stronger in men and patients with ischemic  
6 stroke. The findings of yet another study supported this meta-analysis, revealing that the  
7 BMI categories of overweight and obesity were associated with an increased risk only in  
8 men <sup>5</sup>. It has been shown that there is a positive correlation between the whole range of  
9 BMI categories and ischemic stroke <sup>6</sup>, with no evidence of a threshold or a J-shaped curve  
10 <sup>7,8</sup>. Conversely, the BMI category of underweight in both sexes is also associated with a  
11 higher risk of ischemic stroke, and this category has a significantly higher rate of poor short  
12 and long-term outcomes than the BMI category of normal weight <sup>9,10,11</sup>. Other studies  
13 regarding the association between BMI and the prognosis after acute ischemic stroke have  
14 shown that BMI has a non-linear association with 3-month outcomes in men with acute  
15 ischemic stroke <sup>8</sup>, and that the BMI categories of underweight and obesity were generally  
16 associated with poorer outcomes <sup>12,13,14</sup>.

17 The mechanisms of the nature in which BMI affects ischemic stroke are not fully  
18 understood. However, possible explanations include an elevated BMI increasing the risk of  
19 ischemic stroke by inducing hypertension, diabetes, dyslipidemia, and inflammation, which  
20 are known risk factors for atherosclerosis and thrombosis <sup>15,16</sup>. These risk factors may  
21 impair cerebral blood flow and oxygen delivery, leading to ischemic injury <sup>16</sup>. By contrast,  
22 a low BMI increases the risk of ischemic stroke through malnutrition, anemia, infection,

1 and immunosuppression, which may compromise the brain's resistance to ischemia. In  
2 addition, a low BMI may increase the risk of hemorrhagic transformation after ischemic  
3 stroke due to reduced clotting factors and platelets<sup>17,18</sup>.

4 Some studies have shown that BMI exhibits an influence on the outcomes of ischemic  
5 stroke<sup>19,20</sup>. However, the precise correlation of the wide-ranged BMI classification,  
6 including both categories of obesity and underweight, and characteristic variables of  
7 ischemic stroke have not been fully elucidated.

8 In the present study, we investigated the categorization of the characteristic variables and  
9 outcomes of the acute phase of ischemic stroke by BMI classifications in a single-center  
10 study. Many of these variables were determined by various analyses, such as blood tests  
11 and brain magnetic resonance imaging/angiography (MRI/MRA).

12

## 13 **METHODS**

### 14 *Ethical Approval and Informed Consent*

15 Informed consent was obtained from all study participants. This study was approved by  
16 the Ethics Committee of the Komaki City Hospital (approval number: 231003), and was  
17 performed in accordance with the provisions of the Declaration of Helsinki (as revised in  
18 Brazil 2013).

19

### 20 *Enrolment of Participants*

21 We retrospectively registered 1676 consecutive cases of acute ischemic stroke that were  
22 hospitalized at the Komaki City Hospital from 2018 to 2022. As depicted in Figure 1, a

1 total of 965 participants (622 men and 434 women, mean age  $71.53 \pm 12.42$  years) were  
2 enrolled in the study. The inclusion criteria were as follows: (1) complete independence in  
3 performing ADLs, based on a score of 0 on the modified Rankin Scale in which the  
4 participant lived alone prior to the current episode of ischemic stroke <sup>21</sup>; (2) no previous  
5 medical history of dementia, including Alzheimer's disease; mild cognitive impairment or  
6 neurodegenerative diseases prior to the current ischemic stroke (this medical history was  
7 determined from the case files and interviews with participants and their families); and (3)  
8 participants who underwent brain MRI/MRA with the resultant diagnosis of the current  
9 ischemic stroke. As a result, the following cases were excluded: (i) in-hospital mortalities,  
10 due to missing data (n = 84); (ii) cases in which the participants had previous medical  
11 histories of both ischemic and hemorrhagic stroke (n = 395), dementia (n = 139),  
12 neurodegenerative diseases (n = 19); and (iii) cancer that was not in remission at the time of  
13 the current ischemic stroke (n = 20). In addition, participants who had incomplete  
14 independence in performing activities of daily living (ADLs) before the current ischemic  
15 stroke secondary to conditions such as orthopedic impediments (n = 20) were excluded.  
16 Finally, participants with missing data regarding their clinical examinations and  
17 investigations, such as laboratory blood tests and imaging findings, were not included in the  
18 statistical analysis (n = 34). The BMI, laboratory blood tests, and carotid ultrasounds were  
19 measured on admission, and the National Institutes of Health Stroke Scale (NIHSS) scores  
20 <sup>22</sup> were measured at discharge.

21

22 *Ischemic stroke subtype evaluation*

1 In addition to the clinical categories of the National Institute of Neurological Disorders  
2 and Stroke-Classification of cerebrovascular diseases III of lacunar infarctions (LI),  
3 atherothrombotic (AT), and cardioembolic (CE) strokes <sup>23</sup>, we appended artery-to-artery  
4 (A-to-A) embolic infarctions. Based on the Trial of ORG 10172 in Acute Stroke Treatment  
5 (TOAST) classification, A-to-A embolic infarctions that involve atheroembolic mechanisms  
6 can be distinguished from LI, CE, and AT. Embolic cases in which A-to-A embolic  
7 infarctions and CE strokes could not be diagnosed, or where the source of the embolism  
8 was unknown were classified as: “embolic stroke of undetermined source (ESUS).”  
9 Ischemic strokes secondary to a rare specific etiology, such as vasculitis or postoperative  
10 ischemic stroke, were classified as: “stroke of other determined etiology.” <sup>24</sup>

11

#### 12 *Analyses of MRI/MRA findings*

13 Brain MRI/MRA were performed in all 965 participants on admission to the Komaki City  
14 Hospital. White matter lesions were classified using the Fazekas criteria for periventricular  
15 hyperintensities (PVH) and deep white matter hyperintensities (DWMH) using  
16 T2-weighted or fluid-attenuated inversion recovery images. PVH were graded from 0–3 as  
17 follows: Grade 0 = absence or rim only, Grade 1 = localized lesion depicted as pencil-thin  
18 lining or “caps”, Grade 2 = irregular hyperintensity with a smooth “halo”, and Grade 3 =  
19 irregular lesion extending into the deep white matter and periventricular region <sup>25</sup>. DWMH  
20 were graded from 0–3 as follows: Grade 0 = absence, Grade 1 = punctate foci, Grade 2 =  
21 beginning confluence of foci, and Grade 3 = large confluent areas <sup>26</sup>. On MRA, “stenosis  
22 positive” was defined as the presence of a stenosis or occlusion  $\geq 50\%$  in the intracranial



1 trunk arteries within the visible range <sup>27</sup>.

2

3 *BMI categories*

4 We categorized the participants into four cohorts: underweight (Cohort 1), normal weight  
5 (Cohort 2), overweight (Cohort 3), and obese (Cohort 4) defined as a BMI (kg/m<sup>2</sup>) of <  
6 18.5, 18.5–24.9, 25.0–29.9, and ≥ 30, respectively <sup>28</sup>.

7

8 *Statistical analyses*

9 For the statistical analyses, continuous variables were presented as means ± standard  
10 deviations. Categorical variables were presented as percentages. A chi-square test was  
11 performed to compare categorical variables. A Steel-Dwass test was used for multiple  
12 comparisons. A Mann-Whitney U-test for each two-cohort comparison was performed to  
13 compare continuous variables. To avoid bias, confounding variables were balanced between  
14 cohorts, and propensity score analyses were conducted in which the variables of sex and  
15 age were adjusted for <sup>29</sup>. In the propensity score analyses, one-to-one nearest neighbor  
16 matching without replacement was completed using a caliper width equal to 0.2 of the  
17 standard deviation of the propensity score. After the propensity score analyses, the  
18 comparisons among each of the four selected cohorts were conducted as follows: between  
19 (1) underweight (Cohort 1) vs. normal weight (Cohort 2), (2) normal weight (Cohort 2) vs.  
20 overweight (Cohort 3), (3) normal weight (Cohort 2) vs. obese (Cohort 4), and (4)  
21 overweight (Cohort 3) vs. obese (Cohort 4). For all statistical analyses, data were analyzed  
22 using EZR version 1.55 (Saitama Medical Center, Jichi Medical University, Saitama,

1 Japan)<sup>30</sup>, which is a graphical user interface for R (The R Foundation for Statistical  
2 Computing, version 4.1.2, Vienna, Austria; <http://cran.r-project.org/>). A p-value less than  
3 0.05 was considered statistically significant.

4

## 5 **RESULTS**

### 6 *Demographic characteristics of participants categorized according to BMI classification*

7 The demographic characteristics of the study participants are summarized in Table 1.  
8 Comparisons of demographic data among the four cohorts revealed statistically significant  
9 differences in the variables of age and sex and other clinical indicators, such as hemoglobin  
10 values, leukoaraiosis grades, dyslipidemia, diabetes mellitus, and NIHSS scores. In  
11 particular, with age as a variable, the underweight cohort was statistically significantly  
12 older than the normal-weight cohort ( $p < 0.001$ ); however, the overweight and obesity  
13 cohorts were statistically significantly younger than the normal weight cohort ( $p < 0.001$ ).  
14 Regarding sex as a variable, the underweight cohort had a statistically significant larger  
15 number of women than that in the normal-weight cohort ( $p < 0.001$ ). Furthermore, the  
16 underweight and obesity cohorts had statistically significantly severer NIHSS scores than  
17 those of the normal-weight cohort ( $p = 0.003$ ,  $p = 0.021$ ; respectively).

18

### 19 *Characteristics of the participants analyzed with propensity score matching methods*

20 A propensity score analysis was conducted to avoid bias due to the confounding variables  
21 of age and sex. Table 2 depicts the characteristics of the participants as variables analyzed  
22 with propensity score matching methods. Table 2 (a) reveals the results of the underweight

1 (Cohort 1) and normal weight (Cohort 2) cohorts after the propensity score analyses. These  
2 results revealed that the values of the triglycerides (TG,  $p = 0.013$ ) and glycosylated  
3 hemoglobin (HbA1C,  $p = 0.002$ ) in Cohort 1 were statistically significantly lower than  
4 those in Cohort 2; however, the value of high-density lipoprotein cholesterol (HDL-C) in  
5 Cohort 1 was statistically significantly higher than that in Cohort 2 ( $p = 0.003$ ). Similarly,  
6 Table 2 (b) reveals the results of the normal weight (Cohort 2) and overweight (Cohort 3)  
7 cohorts and showed that the rates of the use of antihypertensive ( $p < 0.001$ ), antidiabetic ( $p$   
8  $= 0.007$ ), and antidyslipidemic ( $p = 0.003$ ) medications in Cohort 3 were statistically  
9 significantly higher than those in Cohort 2. In addition, the values of hemoglobin (Hb) ( $p <$   
10  $0.001$ ), albumin ( $p = 0.001$ ), TG ( $p < 0.001$ ), and low-density lipoprotein cholesterol  
11 (LDL-C) ( $p = 0.004$ ) in Cohort 3 were statistically significantly higher than those in Cohort  
12 2. Furthermore, the value of HDL-C ( $p < 0.001$ ) in Cohort 3 was statistically significantly  
13 lower than that in Cohort 2. Table 2 (c) reveals the results of the normal weight (Cohort 2)  
14 and obese (Cohort 4) cohorts. These results showed that the rates of the use of antidiabetic  
15 ( $p < 0.001$ ) and disease type as atheroembolic ( $p = 0.025$ ), as well as the values of Hb ( $p =$   
16  $0.043$ ), TG ( $p = 0.044$ ), LDL-C ( $p = 0.019$ ), and HBA1C ( $p < 0.001$ ) in Cohort 4 were all  
17 statistically significantly higher than those in Cohort 2. Table 2 (d) reveals the results of the  
18 overweight (Cohort 3) and obese (Cohort 4) cohorts. There were no statistically significant  
19 differences between the values of the clinical indicators for these two cohorts. Additionally,  
20 regarding the NIHSS scores, the propensity score analyses revealed no statistically  
21 significant differences among the four cohorts.

1 **DISCUSSION**

2 In the present study, each of the adverse outcomes (as determined by the NIHSS scores) of  
3 acute ischemic stroke in the underweight and obese cohorts were statistically significantly  
4 severer than those in the normal cohort. However, a propensity score analysis inclusive of  
5 the variables of age and sex revealed no statistically significant difference in these adverse  
6 outcomes among the four cohorts; thus, we hypothesized that these adverse outcomes were  
7 strongly affected by the variables of age and sex <sup>31</sup>.

8 In addition, we found statistically significant differences in hyperlipidemia and  
9 dyslipidemia among the BMI cohorts. Previous literature reporting on the correlations  
10 among BMI, hyperlipidemia, and ischemic stroke were based on cohort studies <sup>27,32,33,34</sup>,  
11 and there is little information regarding investigations performed at the acute phase of  
12 ischemic stroke. The findings of the current study revealed that participants with acute  
13 ischemic stroke in the overweight and obese cohorts had severe hyperlipidemia. These  
14 cohorts had decreased values of HDL-C and increased values of LDL-C and TG; in  
15 particular, the values of LDL-C and TG were severely increased in the obese cohort. In  
16 addition, the elevated percentage values of HBA1C in the obese cohort were indicative of  
17 diabetes mellitus. Previous studies have shown that patients with a high BMI also have  
18 metabolic risk factors, including hyperlipidemia and diabetes mellitus <sup>35,36,37</sup>; therefore, we  
19 postulate that these metabolic risk factors result in ischemic stroke occurring in relatively  
20 younger patients.

21 By contrast, the underweight cohort did not have increased values of LDL-C and TG and  
22 only had a statistically significantly increased HDL-C compared to the normal weight

1 cohort. The sarcopenia risk for stroke-associated infections is associated with a larger BMI  
2 category of  $\geq 18.5$ ; thus, we hypothesize that the pathophysiological mechanisms of  
3 ischemic stroke are different for our cohorts with larger BMIs<sup>15,16,38</sup>. In addition, it is a  
4 well-known fact that a larger body fat distribution, as indicated by an elevated BMI, has a  
5 close relationship with the occurrence of metabolic disorders<sup>39</sup>.

6 The present study has several limitations. First, this was not a population-based study;  
7 patients were referred to this single acute care hospital that has a stroke unit. Second, we  
8 could not further explore the data as per the stroke subtypes. Recent reports have revealed  
9 that the overweight and obese BMI categories are inversely correlated with poor outcomes  
10 of the cardioembolic and small vessel disease subtypes; however, there is no statistically  
11 significant relationship between stroke outcomes and BMI classification for the large artery  
12 disease subtypes<sup>40</sup>. Furthermore, to firmly ratify conclusions, it must be considered that  
13 these findings were observed in a relatively small population size. Therefore, further cohort  
14 studies with larger population sizes are needed. Finally, this study may have been  
15 influenced by unknown variables.

16 In conclusion, the findings of this current study revealed that higher risks of  
17 hyperlipidemia, dyslipidemia, and diabetes mellitus were associated with the higher BMI  
18 categories, viz., the overweight and obese cohorts, in participants with acute ischemic  
19 stroke. This was evidenced by the higher rates of usage of antidiabetic and antidyslipidemic  
20 medication in the overweight cohort, and the raised values of TG, LDL-C, and HBA1C in  
21 the obese cohort than those in the normal weight cohort. By contrast, in participants with  
22 acute ischemic stroke, the lower BMI category, viz., the underweight cohort, did not have

1 hyperlipidemia. Thus, our findings suggest that different pathophysiological mechanisms of  
2 ischemic stroke may exist for higher BMIs. Furthermore, the importance of focusing on the  
3 management of dyslipidemia, hyperlipidemia, and hyperglycemia for the acute phase of  
4 ischemic stroke in patients who are overweight or obese has been highlighted. The  
5 management and control of acute ischemic stroke related to BMI provides potentially  
6 useful information to encourage further studies regarding the relationships between BMI,  
7 metabolic risk factors, and the incidence of acute ischemic stroke.

8

#### 9 **Acknowledgments**

10 We thank the staff of the Komaki City Hospital for collecting the data used in this study.

11

#### 12 **Sources of Funding**

13 The authors state that they have no sources of funding.

14

#### 15 **Conflicts of interest**

16 The authors state that they have no conflicts of interest.

1   **REFERENCES**

- 2   1. Guh DP, Zhang W, Bansback N, Amarsi Z, Birmingham CL, Anis AH. The incidence of  
3   co-morbidities related to obesity and overweight: a systematic review and meta-analysis.  
4   *BMC Public Health*. 2009;9:88. doi: 10.1186/1471-2458-9-88
- 5   2. Qi W, Ma J, Guan T, Zhao D, Abu-Hanna A, Schut M, Chao B, Wang L, Liu Y. Risk  
6   Factors for Incident Stroke and Its Subtypes in China: A Prospective Study. *J Am Heart*  
7   *Assoc*. 2020;9:e016352. doi: 10.1161/JAHA.120.016352.
- 8   3. Keys A, Fidanza F, Karvonen MJ, Kimura N, Taylor HL. Indices of relative weight and  
9   obesity. *J Chronic Dis*. 1972;25:329-343. doi: 10.1016/0021-9681(72)90027-6.
- 10   4. Wang X, Huang Y, Chen Y, Yang T, Su W, Chen X, Yan F, Han L, Ma Y. The relationship  
11   between body mass index and stroke: a systemic review and meta-analysis. *J Neurol*.  
12   2022;269:6279-6289. doi: 10.1007/s00415-022-11318-1.
- 13   5. Shiozawa M, Kaneko H, Itoh H, Morita K, Okada A, Matsuoka S, Kiriyama H, Kamon T,  
14   Fujiu K, Michihata N, et al. Association of Body Mass Index with Ischemic and  
15   Hemorrhagic Stroke. *Nutrients*. 2021;13:2343. doi: 10.3390/nu13072343.
- 16   6. Song YM, Sung J, Davey Smith G, Ebrahim S. Body mass index and ischemic and  
17   hemorrhagic stroke: a prospective study in Korean men. *Stroke*. 2004;35:831-836. doi:  
18   10.1161/01.STR.0000119386.22691.1C.
- 19   7. Horn JW, Feng T, Mørkedal B, Aune D, Strand LB, Horn J, Mukamal KJ, Janszky I.  
20   Body Mass Index Measured Repeatedly over 42 Years as a Risk Factor for Ischemic Stroke:  
21   The HUNT Study. *Nutrients*. 2023;15:1232. doi: 10.3390/nu15051232.
- 22   8. Zan Y, Xiong W, Zhang X, Han Y, Cao C, Hu H, Wang Y, Ou H. Body mass index has a

- 1 non-linear association with three-month outcomes in men with acute ischemic stroke: An  
2 analysis based on data from a prospective cohort study. *Front Endocrinol (Lausanne)*.  
3 2022;13:1041379. doi: 10.3389/fendo.2022.1041379.
- 4 9. Jiang Y, Liu Z, Liao Y, Sun S, Dai Y, Tang Y. Ischemic stroke: From pathological  
5 mechanisms to neuroprotective strategies. *Front Neurol*. 2022;13:1013083. doi:  
6 10.3389/fneur.2022.1013083.
- 7 10. Chaudhary D, Khan A, Gupta M, Hu Y, Li J, Abedi V, Zand R. Obesity and mortality  
8 after the first ischemic stroke: Is obesity paradox real? *PLoS One*. 2021;16:e0246877. doi:  
9 10.1371/journal.pone.0246877.
- 10 11. Kawase S, Kowa H, Suto Y, Fukuda H, Kusumi M, Nakayasu H, Nakashima K.  
11 Association between body mass index and outcome in Japanese ischemic stroke patients.  
12 *Geriatr Gerontol Int*. 2017;17:369-374. doi: 10.1111/ggi.12713.
- 13 12. Song YM, Sung J, Davey Smith G, Ebrahim S. Body mass index and ischemic and  
14 hemorrhagic stroke: a prospective study in Korean men. *Stroke*. 2004;35:831-836. doi:  
15 10.1161/01.STR.0000119386.22691.1C.
- 16 13. Li X, Xu Q, Wang A, Zheng P, Zhu H, Guo A, Meng X, Jiang Y. Association of body  
17 mass index and waist-to-height ratio with outcomes in ischemic stroke: results from the  
18 Third China National Stroke Registry. *BMC Neurol*. 2023;23:152. doi:  
19 10.1186/s12883-023-03165-y.
- 20 14. Elagizi A, Kachur S, Lavie CJ, Carbone S, Pandey A, Ortega FB, Milani RV. An  
21 Overview and Update on Obesity and the Obesity Paradox in Cardiovascular Diseases.  
22 *Prog Cardiovasc Dis*. 2018;61:142-150. doi: 10.1016/j.pcad.2018.07.003.



- 1 15. Jiang Y, Liu Z, Liao Y, Sun S, Dai Y, Tang Y. Ischemic stroke: From pathological  
2 mechanisms to neuroprotective strategies. *Front Neurol.* 2022;13:1013083. doi:  
3 10.3389/fneur.2022.1013083.
- 4 16. Park H, Lee HW, Yoo J, Lee HS, Nam HS, Kim YD, Heo JH. Body Mass Index and  
5 Prognosis in Ischemic Stroke Patients With Type 2 Diabetes Mellitus. *Front Neurol.*  
6 2019;10:563. doi: 10.3389/fneur.2019.00563.
- 7 17. Song X, Chen X, Bai J, Zhang J. Association between pre-stroke sarcopenia risk and  
8 stroke-associated infection in older people with acute ischemic stroke. *Front Med*  
9 *(Lausanne)*. 2023;10:1090829. doi: 10.3389/fmed.2023.1090829.
- 10 18. Bazzano LA, Gu D, Whelton MR, Wu X, Chen CS, Duan X, Chen J, Chen JC, He J.  
11 Body mass index and risk of stroke among Chinese men and women. *Ann Neurol.*  
12 2010;67:11-20. doi: 10.1002/ana.21950.
- 13 19. Liu X, Zhang D, Liu Y, Sun X, Hou Y, Wang B, Ren Y, Zhao Y, Han C, Cheng C, et al.  
14 A J-shaped relation of BMI and stroke: Systematic review and dose-response meta-analysis  
15 of 4.43 million participants. *Nutr Metab Cardiovasc Dis.* 2018;28:1092-1099. doi:  
16 10.1016/j.numecd.2018.07.004.
- 17 20. Dicipinigaitis AJ, Palumbo KE, Gandhi CD, Cooper JB, Hanft S, Kamal H, Shapiro SD,  
18 Feldstein E, Kafina M, Kurian C, et al. Association of Elevated Body Mass Index with  
19 Functional Outcome and Mortality following Acute Ischemic Stroke: The Obesity Paradox  
20 Revisited. *Cerebrovasc Dis.* 2022;51:565-569. doi: 10.1159/000521513.
- 21 21. van Swieten JC, Koudstaal PJ, Visser MC, Schouten HJ, van Gijn J. Interobserver  
22 agreement for the assessment of handicap in stroke patients. *Stroke.* 1988;19:604-607. doi:

1 10.1161/01.str.19.5.604.

2 22. Goldstein LB, Samsa GP. Reliability of the National Institutes of Health Stroke Scale.  
3 Extension to non-neurologists in the context of a clinical trial. *Stroke*. 1997;28:307-310.  
4 doi: 10.1161/01.str.28.2.307.

5 23. Special report from the National Institute of Neurological Disorders and Stroke.  
6 Classification of cerebrovascular disease III. *Stroke*. 1990;21:637-676.  
7 doi:10.1161/01.str.21.4.637.

8 24. Adams HP Jr, Bendixen BH, Kappelle LJ, Biller J, Love BB, Gordon DL, Marsh EE 3rd.  
9 Classification of subtype of acute ischemic stroke. Definitions for use in a multicenter  
10 clinical trial. TOAST. Trial of Org 10172 in Acute Stroke Treatment. *Stroke*. 1993;24:35-41.  
11 doi: 10.1161/01.str.24.1.35.

12 25. Fazekas F, Chawluk JB, Alavi A, Hurtig HI, Zimmerman RA. MR signal abnormalities  
13 at 1.5 T in Alzheimer's dementia and normal aging. *AJNR Am J Roentgenol*.  
14 1987;149:351-356. doi: 10.2214/ajr.149.2.351.

15 26. Fazekas F, Kleinert R, Offenbacher H, Payer F, Schmidt R, Kleinert G, Radner H,  
16 Lechner H. The morphologic correlate of incidental punctate white matter hyperintensities  
17 on MR images. *AJNR Am J Neuroradiol*. 1991;12:915-921.

18 27. Henninger N, Khan MA, Zhang J, Moonis M, Goddeau RP Jr. Leukoaraiosis predicts  
19 cortical infarct volume after distal middle cerebral artery occlusion. *Stroke*.  
20 2014;45:689-695. doi: 10.1161/STROKEAHA.113.002855.

21 28. Itoh H, Kaneko H, Kiriya H, Kamon T, Fujiu K, Morita K, Yotsumoto H, Michihata  
22 N, Jo T, Takeda N, et al. Reverse J-shaped relationship between body mass index and

- 1 in-hospital mortality of patients hospitalized for heart failure in Japan. *Heart Vessels*.  
2 2021;36:383-392. doi: 10.1007/s00380-020-01699-6.
- 3 29. Stürmer T, Joshi M, Glynn RJ, Avorn J, Rothman KJ, Schneeweiss S. A review of the  
4 application of propensity score methods yielded increasing use, advantages in specific  
5 settings, but not substantially different estimates compared with conventional multivariable  
6 methods. *J Clin Epidemiol*. 2006;59:437-447. doi: 10.1016/j.jclinepi.2005.07.004.
- 7 30. Kanda Y. Investigation of the freely available easy-to-use software 'EZR' for medical  
8 statistics. *Bone Marrow Transplant*. 2013;48:452-458. Epub 2012/12/05. doi:  
9 10.1038/bmt.2012.244.
- 10 31. Roy-O'Reilly M, McCullough LD. Age and Sex Are Critical Factors in Ischemic Stroke  
11 Pathology. *Endocrinology*. 2018;159:3120-3131. doi: 10.1210/en.2018-00465.
- 12 32. Xu T, Zhang JT, Yang M, Zhang H, Liu WQ, Kong Y, Xu T, Zhang YH. Dyslipidemia  
13 and outcome in patients with acute ischemic stroke. *Biomed Environ Sci*. 2014;27:106-110.  
14 doi: 10.3967/bes2014.023.
- 15 33. Kawate N, Kayaba K, Hara M, Kotani K, Ishikawa S; Jichi Medical School Cohort  
16 Study Group. Body mass index and stroke incidence in Japanese community residents: The  
17 Jichi Medical School (JMS) Cohort Study. *J Epidemiol*. 2017;27:325-330. doi:  
18 10.1016/j.je.2016.08.007.
- 19 34. Zhang P, Yan XL, Qu Y, Guo ZN, Yang Y. Association between abnormal body weight  
20 and stroke outcome: A meta-analysis and systematic review. *Eur J Neurol*. 2021  
21 Aug;28(8):2552-2564. doi: 10.1111/ene.14881.
- 22 35. Hu H, Hori A, Nishiura C, Sasaki N, Okazaki H, Nakagawa T, Honda T, Yamamoto S,

- 1 Tomita K, Miyamoto T, et al. HbA1c, Blood Pressure, and Lipid Control in People with  
2 Diabetes: Japan Epidemiology Collaboration on Occupational Health Study. *PLoS One*.  
3 2016;11:e0159071. doi: 10.1371/journal.pone.0159071.
- 4 36. Hori A, Nanri A, Sakamoto N, Kuwahara K, Nagahama S, Kato N, Fukasawa K,  
5 Nakamoto K, Ohtsu M, Matsui A, et al. Comparison of body mass index, waist  
6 circumference, and waist-to-height ratio for predicting the clustering of cardiometabolic  
7 risk factors by age in Japanese workers--Japan Epidemiology Collaboration on  
8 Occupational Health study. *Circ J*. 2014;78:1160-1168. doi: 10.1253/circj.cj-13-1067.
- 9 37. Matsushita Y, Tomita K, Yokoyama T, Mizoue T. Relations between waist  
10 circumference at four sites and metabolic risk factors. *Obesity (Silver Spring)*.  
11 2010;18:2374-2378. doi: 10.1038/oby.2010.33.
- 12 38. Scherbakov N, Sandek A, Doehner W: Stroke-related sarcopenia: specific  
13 characteristics. *J Am Med Dir Assoc*. 2015;16:272-276. doi: 10.1016/j.jamda.2014.12.007.
- 14 39. Examination Committee of Criteria for 'Obesity Disease' in Japan; Japan Society for the  
15 Study of Obesity. New criteria for 'obesity disease' in Japan. *Circ J*. 2002 ;66:987-992. doi:  
16 10.1253/circj.66.987.
- 17 40. Lee SH, Jung JM, Park MH. Obesity paradox and stroke outcomes according to stroke  
18 subtype: a propensity score-matched analysis. *Int J Obes (Lond)*. 2023;47:669-676. doi:  
19 10.1038/s41366-023-01318-0.

1 **Figure 1. Flowchart Depicting Enrolment of Participants**

2 Consecutive cases of acute ischemic stroke were registered at the Komaki City Hospital  
3 database between January 2018 and December 2022 (n = 1676). We excluded mortalities (n  
4 = 84). We also excluded participants who had previous medical histories of both ischemic  
5 and hemorrhagic stroke (n = 395), dementia (n = 139), neurodegenerative diseases (n = 19),  
6 and cancer that was not in remission at the time of the current ischemic stroke (n = 20).  
7 In addition, participants who had incomplete independence in performing activities of daily  
8 living (ADLs) before the current ischemic stroke secondary to conditions such as  
9 orthopedic impediments (n = 20) were excluded. Participants with missing data regarding  
10 their clinical examinations and investigations, such as laboratory blood tests and imaging  
11 findings, were not included in the statistical analysis (n = 34). Finally, 965 participants were  
12 included in the present study.

**Table 1: Demographic characteristics of participants categorized according to body mass index classification**

|                                              | All (n=965)    | Cohort 1 (n=82) | Cohort 2 (n=623) | Cohort 3 (n=212) | Cohort 4 (n=48)   | p-value<br>Steel-Dwass test | p-value (post-hoc analysis as each two group comparison) |               |               |               |
|----------------------------------------------|----------------|-----------------|------------------|------------------|-------------------|-----------------------------|----------------------------------------------------------|---------------|---------------|---------------|
|                                              |                | BMI<18.5        | 18.5≤BMI<25      | 25≤BMI<30        | 30≤BMI            |                             | Cohort 1 vs 2                                            | Cohort 2 vs 3 | Cohort 2 vs 4 | Cohort 3 vs 4 |
| Age (years)                                  | 71.53±12.42    | 78.91±9.93      | 72.81±11.42      | 68.42±12.31      | 55.95±13.39       | <0.001†                     | <0.001†                                                  | <0.001†       | <0.001†       | <0.001†       |
| Male /Female                                 | 622 / 343      | 37 / 45         | 413 / 210        | 140 / 72         | 32 / 16           | 0.002†                      | 0.001†                                                   | 0.999         | 0.999         | 0.999         |
| Body Mass Index (kg/m <sup>2</sup> )         | 23.29±3.87     | 17.10±1.34      | 22.14±1.71       | 26.85±1.36       | 33.01±4.34        | <0.001†                     | <0.001†                                                  | <0.001†       | <0.001†       | <0.001†       |
| Length of hospitalization (days)             | 16.79±12.92    | 21.96±18.24     | 16.64±12.42      | 15.88±12.21      | 13.81±8.85        | 0.001†                      | 0.005†                                                   | 0.941         | 0.600         | 0.779         |
| Risk factor and comorbidity                  |                |                 |                  |                  |                   |                             |                                                          |               |               |               |
| Current smoker, n (%)                        | 218 (22.6%)    | 10 (12.2%)      | 135 (21.7%)      | 53 (25.0%)       | 20 (41.7%)        | <0.001†                     | 0.107                                                    | 0.007†        | 0.999         | 0.321         |
| History of heart disease†, n (%)             | 94 (9.7%)      | 6 (7.3%)        | 63 (10.1%)       | 22 (10.4%)       | 3 (6.3%)          | 0.002†                      | 0.063                                                    | 0.089         | 0.774         | 0.993         |
| Current medication                           |                |                 |                  |                  |                   |                             |                                                          |               |               |               |
| Hypertension, n (%)                          | 663 (68.7%)    | 44 (53.7%)      | 421 (67.6%)      | 166 (78.3%)      | 32 (66.7%)        | 0.001†                      | 0.190                                                    | 0.748         | 0.084         | 0.094         |
| Diabetes mellitus, n (%)                     | 240 (24.9%)    | 13 (15.9%)      | 139 (22.3%)      | 66 (31.1%)       | 22 (45.8%)        | <0.001†                     | 0.554                                                    | 0.049†        | 0.001†        | 0.211         |
| Dyslipidemia, n (%)                          | 445 (46.1%)    | 25 (30.5%)      | 280 (44.9%)      | 115 (54.2%)      | 25 (52.1%)        | 0.704                       | 0.854                                                    | 0.995         | 0.823         | 0.818         |
| Ischemic stroke subtype                      |                |                 |                  |                  |                   |                             |                                                          |               |               |               |
| Lacunar infarction, n (%)                    | 125 (13.0%)    | 2 (2.4%)        | 75 (12.0%)       | 38 (17.9%)       | 10 (20.8%)        | 0.001†                      | 0.043†                                                   | 0.133         | 0.290         | 0.966         |
| Atherothrombotic infarction, n (%)           | 314 (32.5%)    | 28 (34.1%)      | 188 (30.2%)      | 75 (35.4%)       | 23 (47.9%)        | 0.055                       | 0.755                                                    | 0.993         | 0.276         | 0.463         |
| Artery-to-artery embolic stroke, n (%)       | 227 (23.5%)    | 15 (18.3%)      | 154 (24.7%)      | 50 (23.6%)       | 8 (16.7%)         | 0.103                       | 0.999                                                    | 0.510         | 0.382         | 0.877         |
| Cardioembolic stroke, n (%)                  | 150 (15.5%)    | 20 (24.4%)      | 107 (17.2%)      | 20 (9.4%)        | 3 (6.3%)          | 0.393                       | 0.525                                                    | 0.871         | 0.289         | 0.489         |
| Embolic stroke of undetermined source, n (%) | 120 (12.4%)    | 15 (18.3%)      | 80 (12.8%)       | 23 (10.8%)       | 2 (4.2%)          | 0.002†                      | 0.575                                                    | 0.987         | 0.591         | 0.727         |
| Stroke of other determined etiology, n (%)   | 29 (3.0%)      | 2 (2.4%)        | 19 (3.0%)        | 6 (2.8%)         | 2 (4.2%)          | 0.953                       | 0.380                                                    | 0.034         | 0.199         | 0.897         |
| Emergency endovascular treatment, n (%)      | 90 (9.3%)      | 12 (14.6%)      | 58 (9.3%)        | 9 (0.9%)         | 1 (2.1%)          | 0.125                       | 0.429                                                    | 0.999         | 0.322         | 0.372         |
| MRI-PVH grade                                | 0.699±0.802    | 1.012±0.936     | 0.717±0.786      | 0.613±0.779      | 0.312±0.657       | <0.001†                     | 0.032†                                                   | 0.218         | <0.001†       | 0.028†        |
| MRI-DWMH grade                               | 1.107±0.802    | 1.402±0.783     | 1.118±0.791      | 1.028±0.814      | 0.812±0.790       | <0.001†                     | 0.016†                                                   | 0.386         | 0.030†        | 0.285         |
| MRA stenosis ≥50% or occlusion (+), n (%)    | 296 (30.7%)    | 31 (37.8%)      | 186 (29.9%)      | 65 (30.7%)       | 14 (29.2%)        | 0.531                       | 0.459                                                    | 0.996         | 0.999         | 0.997         |
| Echo ICA stenosis ≥30% (+), n (%)            | 411 (42.6%)    | 44 (53.7%)      | 278 (44.6%)      | 80 (37.7%)       | 9 (18.8%)         | <0.001†                     | 0.412                                                    | 0.298         | 0.003†        | 0.060         |
| Laboratory blood tests on admission          |                |                 |                  |                  |                   |                             |                                                          |               |               |               |
| Hb (g/L)                                     | 140.6±46.1     | 126.2±19.7      | 138.0±19.2       | 145.1±17.0       | 151.4±21.1        | <0.001†                     | <0.001†                                                  | <0.001†       | <0.001†       | 0.031†        |
| BUN (mmol/L)                                 | 5.018±2.757    | 7.097±3.671     | 6.347±2.590      | 5.930±2.853      | 5.426±2.198       | <0.001†                     | 0.761                                                    | 0.001†        | 0.005†        | 0.446         |
| Cre (umol/L)                                 | 80.21±75.41    | 77.70±76.47     | 87.69±64.27      | 78.23±25.72      | 75.23±25.72       | 0.006†                      | 0.009†                                                   | 0.826         | 0.881         | 0.699         |
| Total protein (g/dl)                         | 71.4±5.667     | 70.45±5.91      | 71.40±5.72       | 74.73±5.47       | 72.08±5.41        | 0.249                       | 0.616                                                    | 0.858         | 0.530         | 0.868         |
| Albumin (g/dl)                               | 40.07±4.35     | 37.91±4.84      | 39.84±4.34       | 41.37±3.58       | 40.91±4.97        | <0.001†                     | 0.003†                                                   | <0.001†       | 0.311         | 0.982         |
| Total cholesterol (mmol/L)                   | 5.116±1.107    | 5.156±1.115     | 5.004±1.079      | 5.286±1.048      | 5.725±1.406       | <0.001†                     | 0.652                                                    | 0.002†        | 0.002†        | 0.279         |
| Triglycerides (mmol/L)                       | 1.286±0.777    | 1.068±0.386     | 1.365±0.727      | 1.712±0.876      | 2.437±1.958       | <0.001†                     | 0.002†                                                   | <0.001†       | <0.001†       | 0.039†        |
| HDL cholesterol (mmol/L)                     | 1.396±0.416    | 1.618±0.436     | 1.405±0.382      | 1.281±0.353      | 1.388±0.759       | <0.001†                     | <0.001†                                                  | <0.001†       | 0.086         | 0.999         |
| LDL cholesterol (mmol/L)                     | 3.234±1.032    | 3.130±0.940     | 3.145±1.053      | 3.434±0.962      | 3.686±0.969       | <0.001†                     | 0.999                                                    | <0.001†       | 0.001†        | 0.347         |
| HbA1C (%)                                    | 6.583±3.020    | 5.960±0.783     | 6.573±3.571      | 6.648±1.624      | 7.475±1.981       | <0.001†                     | 0.088                                                    | 0.044†        | <0.001†       | 0.003†        |
| NIHSS at discharge (IQR/min-max)             | 2.0 (1-7/0-37) | 5.5 (2-11/0-32) | 2.0 (1-7/0-35)   | 2.0 (0-5/0-37)   | 1.0 (1-3.25/0-17) | <0.002†                     | 0.003†                                                   | 0.723         | 0.021†        | 0.090         |
| Nasogastric tubefeeding (+), n (%)           | 66 (6.8%)      | 9 (11.0%)       | 49 (7.9%)        | 7 (3.3%)         | 1 (2.1%)          | 0.048†                      | 0.908                                                    | 0.114         | 0.473         | 0.971         |

MRI: magnetic resonance imaging, PVH: periventricular hyperintensity, DWMH: deep white matter hyperintensity, MRA: magnetic resonance angiography, ICA: internal carotid artery, Hb: hemoglobin, BUN: blood urea nitrogen, Cre: creatinine, HDL: high density lipoprotein, LDL: low density lipoprotein, HbA1c: glycohemoglobin, NIHSS: national institute of health stroke scale, IQR: interquartile range. Dagger indicates statistically significant differences.

**Table 2: Characteristics of the participants analyzed with propensity score matching methods**

|                                              | (a) underweight vs normal weight |                 |         | (b) normal weight vs overweight |                  |         | (c) normal weight vs obese |                 |         | (d) overweight weight vs obese |                 |         |
|----------------------------------------------|----------------------------------|-----------------|---------|---------------------------------|------------------|---------|----------------------------|-----------------|---------|--------------------------------|-----------------|---------|
|                                              | Cohort 1 (n=82)                  | Cohort 2 (n=82) | p-value | Cohort 2 (n=209)                | Cohort 3 (n=209) | p-value | Cohort 2 (n=42)            | Cohort 4 (n=42) | p-value | Cohort 3 (n=42)                | Cohort 4 (n=42) | p-value |
|                                              | BMI<18.5                         | 18.5≤BMI<25     |         | 18.5≤BMI<25                     | 25≤BMI<30        |         | 18.5≤BMI<25                | 30≤BMI          |         | 25≤BMI<30                      | 30≤BMI          |         |
| Age (years)                                  | 78.91±9.93                       | 78.44±8.80      | 0.746   | 68.89±12.15                     | 68.69±12.2       | 0.866   | 58.07±12.45                | 58.36±12.51     | 0.917   | 58.60±11.98                    | 58.76±11.84     | 0.949   |
| Male /Female                                 | 37 / 45                          | 34 / 48         | 0.639   | 132 / 77                        | 140 / 69         | 0.413   | 33 / 9                     | 29 / 13         | 0.327   | 30 / 12                        | 28 / 14         | 0.489   |
| Body Mass Index (kg/m <sup>2</sup> )         | 17.10±1.34                       | 21.95±1.77      | <0.001† | 22.02±1.79                      | 26.85±1.36       | <0.001† | 22.69±1.57                 | 33.05±4.59      | <0.001† | 26.85±1.37                     | 33.17±4.59      | <0.001† |
| Length of hospitalization (days)             | 21.96±18.24                      | 17.05±12.48     | 0.054   | 15.26±10.32                     | 15.94±12.28      | 0.543   | 11.98±8.16                 | 14.02±9.24      | 0.285   | 14.508±9.35                    | 14.21±9.36      | 0.889   |
| Risk factor and comorbidity                  |                                  |                 |         |                                 |                  |         |                            |                 |         |                                |                 |         |
| Current smoker, n (%)                        | 10 (12.2%)                       | 8 (9.8%)        | 0.620   | 64 (30.6%)                      | 52 (24.9%)       | 0.191   | 17 (40.5%)                 | 17 (40.5%)      | 1.000   | 14 (33.3%)                     | 16 (42.9%)      | 0.375   |
| History of heart disease†, n (%)             | 6 (7.3%)                         | 12 (14.6%)      | 0.136   | 23 (11.0%)                      | 22 (10.5%)       | 0.875   | 3 (7.1%)                   | 3 (7.1%)        | 1.000   | 4 (9.5%)                       | 3 (7.1%)        | 0.697   |
| Current medication                           |                                  |                 |         |                                 |                  |         |                            |                 |         |                                |                 |         |
| Hypertension, n (%)                          | 44 (53.7%)                       | 60 (73.2%)      | 0.009†  | 133 (63.6%)                     | 163 (78.0%)      | 0.001†  | 21 (50.0%)                 | 29 (69.0%)      | 0.077   | 32 (76.2%)                     | 29 (69.0%)      | 0.469   |
| Diabetes mellitus, n (%)                     | 13 (15.9%)                       | 24 (29.3%)      | 0.040†  | 41 (19.6%)                      | 65 (31.1%)       | 0.007†  | 4 (9.5%)                   | 18 (42.9%)      | <0.001† | 13 (31.0%)                     | 20 (47.6%)      | 0.121   |
| Dyslipidemia, n (%)                          | 25 (30.5%)                       | 36 (44.0%)      | 0.076   | 84 (40.2%)                      | 114 (54.5%)      | 0.003†  | 16 (38.1%)                 | 23 (54.8%)      | 0.129   | 27 (64.3%)                     | 22 (52.4%)      | 0.274   |
| Ischemic stroke subtype                      |                                  |                 |         |                                 |                  |         |                            |                 |         |                                |                 |         |
| Lacunar infarction, n (%)                    | 2 (2.4%)                         | 8 (9.8%)        | 0.051   | 25 (12.0%)                      | 38 (18.2%)       | 0.076   | 6 (14.3%)                  | 10 (23.9%)      | 0.272   | 5 (11.9%)                      | 9 (21.4%)       | 0.247   |
| Atherothrombotic infarction, n (%)           | 28 (34.1%)                       | 22 (26.8%)      | 0.251   | 67 (32.1%)                      | 73 (34.9%)       | 0.535   | 11 (26.2%)                 | 21 (50.0%)      | 0.025†  | 13 (31.0%)                     | 23 (54.8%)      | 0.028†  |
| Artery-to-artery embolic stroke, n (%)       | 15 (18.3%)                       | 15 (18.3%)      | 1.000   | 47 (22.5%)                      | 50 (23.9%)       | 0.729   | 8 (19.0%)                  | 6 (14.3%)       | 0.564   | 11 (26.2%)                     | 6 (14.2%)       | 0.179   |
| Cardioembolic stroke, n (%)                  | 20 (24.4%)                       | 20 (24.4%)      | 1.000   | 31 (14.8%)                      | 20 (9.6%)        | 0.101   | 7 (16.7%)                  | 2 (4.7%)        | 0.079   | 5 (11.9%)                      | 2 (4.8%)        | 0.241   |
| Embolic stroke of undetermined source, n (%) | 15 (18.3%)                       | 14 (17.1%)      | 0.839   | 28 (13.4%)                      | 23 (11.0%)       | 0.456   | 7 (16.7%)                  | 1 (2.4%)        | 0.026†  | 4 (9.5%)                       | 1 (2.4%)        | 0.171   |
| Stroke of other determined etiology, n (%)   | 2 (2.4%)                         | 3 (3.7%)        | 0.652   | 11 (5.2%)                       | 5 (2.4%)         | 0.127   | 3 (7.1%)                   | 2 (4.7%)        | 0.649   | 4 (9.5%)                       | 1 (2.4%)        | 0.171   |
| Emergency endovascular treatment, n (%)      | 12 (14.6%)                       | 8 (9.8%)        | 0.343   | 22 (10.5%)                      | 19 (9.1%)        | 0.623   | 4 (9.5%)                   | 1 (2.4%)        | 0.171   | 7 (16.7%)                      | 1 (2.4%)        | 0.026†  |
| MRI-PVH grade                                | 1.012±0.936                      | 0.829±0.587     | 0.173   | 0.622±0.655                     | 0.617±0.673      | 0.950   | 0.357±0.544                | 0.357±0.527     | 1.000   | 0.405±0.504                    | 0.333±0.508     | 0.620   |
| MRI-DWMH grade                               | 1.402±0.783                      | 1.207±0.556     | 0.098   | 1.001±0.550                     | 1.029±0.588      | 0.807   | 0.738±0.633                | 0.881±0.545     | 0.397   | 0.905±0.646                    | 0.881±0.857     | 0.895   |
| MRA stenosis ≥50% or occlusion (+), n (%)    | 31 (37.8%)                       | 25 (30.5%)      | 0.326   | 53 (25.3%)                      | 65 (31.1%)       | 0.193   | 11 (26.2%)                 | 11 (26.2%)      | 1.000   | 17 (40.5%)                     | 10 (23.9%)      | 0.104   |
| Echo ICA stenosis ≥30% (+), n (%)            | 44 (53.7%)                       | 42 (51.2%)      | 0.756   | 86 (41.1%)                      | 79 (37.8%)       | 0.485   | 13 (31.0%)                 | 7 (16.7%)       | 0.127   | 12 (28.6%)                     | 7 (16.7%)       | 0.197   |
| Laboratory blood tests on admission          |                                  |                 |         |                                 |                  |         |                            |                 |         |                                |                 |         |
| Hb (g/L)                                     | 126.2±19.7                       | 131.6±16.1      | 0.058   | 138.2±19.9                      | 145.3±16.9       | <0.001† | 142.7±17.0                 | 151.5±21.8      | 0.043†  | 150.0±13.2                     | 148.8±20.9      | 0.751   |
| BUN (mmol/L)                                 | 7.097±3.671                      | 6.844±2.899     | 0.625   | 16.49±6.54                      | 16.67±7.99       | 0.796   | 4.787±1.674                | 5.401±2.185     | 0.153   | 5.766±1.867                    | 5.476±1.553     | 0.529   |
| Cre (umol/L)                                 | 77.70±76.47                      | 83.10±61.88     | 0.603   | 76.91±53.92                     | 78.68±25.64      | 0.611   | 69.84±22.10                | 75.14±25.63     | 0.312   | 77.79±21.22                    | 76.91±27.40     | 0.861   |
| Total protein (g/dl)                         | 70.45±5.91                       | 71.40±5.72      | 0.648   | 71.14±4.42                      | 71.53±4.31       | 0.480   | 71.31±4.47                 | 72.38±4.13      | 0.360   | 71.98±3.64                     | 71.90±4.49      | 0.950   |
| Albumin (g/dl)                               | 37.91±4.84                       | 39.84±4.34      | 0.156   | 40.00±3.42                      | 41.38±2.83       | 0.001†  | 41.21±2.66                 | 41.21±3.74      | 1.000   | 42.12±2.33                     | 40.36±3.88      | 0.053   |
| Total cholesterol (mmol/L)                   | 5.156±1.115                      | 4.873±1.185     | 0.115   | 5.083±1.141                     | 5.276±1.051      | 0.061   | 5.232±0.922                | 5.651±1.222     | 0.080   | 5.496±1.044                    | 5.756±1.434     | 0.344   |
| Triglycerides (mmol/L)                       | 1.068±0.386                      | 1.194±0.872     | 0.013†  | 1.355±0.386                     | 1.724±0.766      | <0.001† | 1.666±1.001                | 2.217±1.252     | 0.044†  | 1.841±0.963                    | 2.398±1.750     | 0.108   |
| HDL cholesterol (mmol/L)                     | 1.618±0.436                      | 1.424±0.385     | 0.003†  | 1.444±0.436                     | 1.275±0.349      | <0.001† | 1.460±0.402                | 1.416±0.805     | 0.752   | 1.190±0.330                    | 1.425±0.800     | 0.082   |
| LDL cholesterol (mmol/L)                     | 3.130±0.940                      | 3.009±1.628     | 0.441   | 3.156±0.941                     | 3.426±0.966      | 0.004†  | 3.186±0.856                | 3.653±0.935     | 0.019†  | 3.664±0.969                    | 3.690±0.975     | 0.904   |
| HbA1C (%)                                    | 5.960±0.783                      | 6.573±3.571     | 0.002†  | 6.652±1.494                     | 6.644±1.096      | 0.984   | 5.819±0.430                | 7.452±1.380     | <0.001† | 6.880±2.040                    | 7.480±1.940     | 0.169   |
| NIHSS at discharge (IQR/min-max)             | 5.5 (2-11/0-32)                  | 3.0 (1-7/0-35)  | 0.234   | 2.0 (1-5/0-33)                  | 2.0 (1-4/0-37)   | 0.473   | 2.0 (1-3/0-21)             | 1.0 (1-2/0-17)  | 0.313   | 2.0 (1-3/0-21)                 | 1.0 (1-2/0-17)  | 0.313   |
| Nasogastric tubefeeding (+), n (%)           | 9 (11.0%)                        | 9 (11.0%)       | 1.000   | 13 (6.2%)                       | 13 (6.2%)        | 1.000   | 2 (7.1%)                   | 1 (2.4%)        | 0.311   | 0 (0%)                         | 1 (2.4%)        | 0.320   |

# Study abbreviations are explained in a footnote to Table 1.

# Figure 1

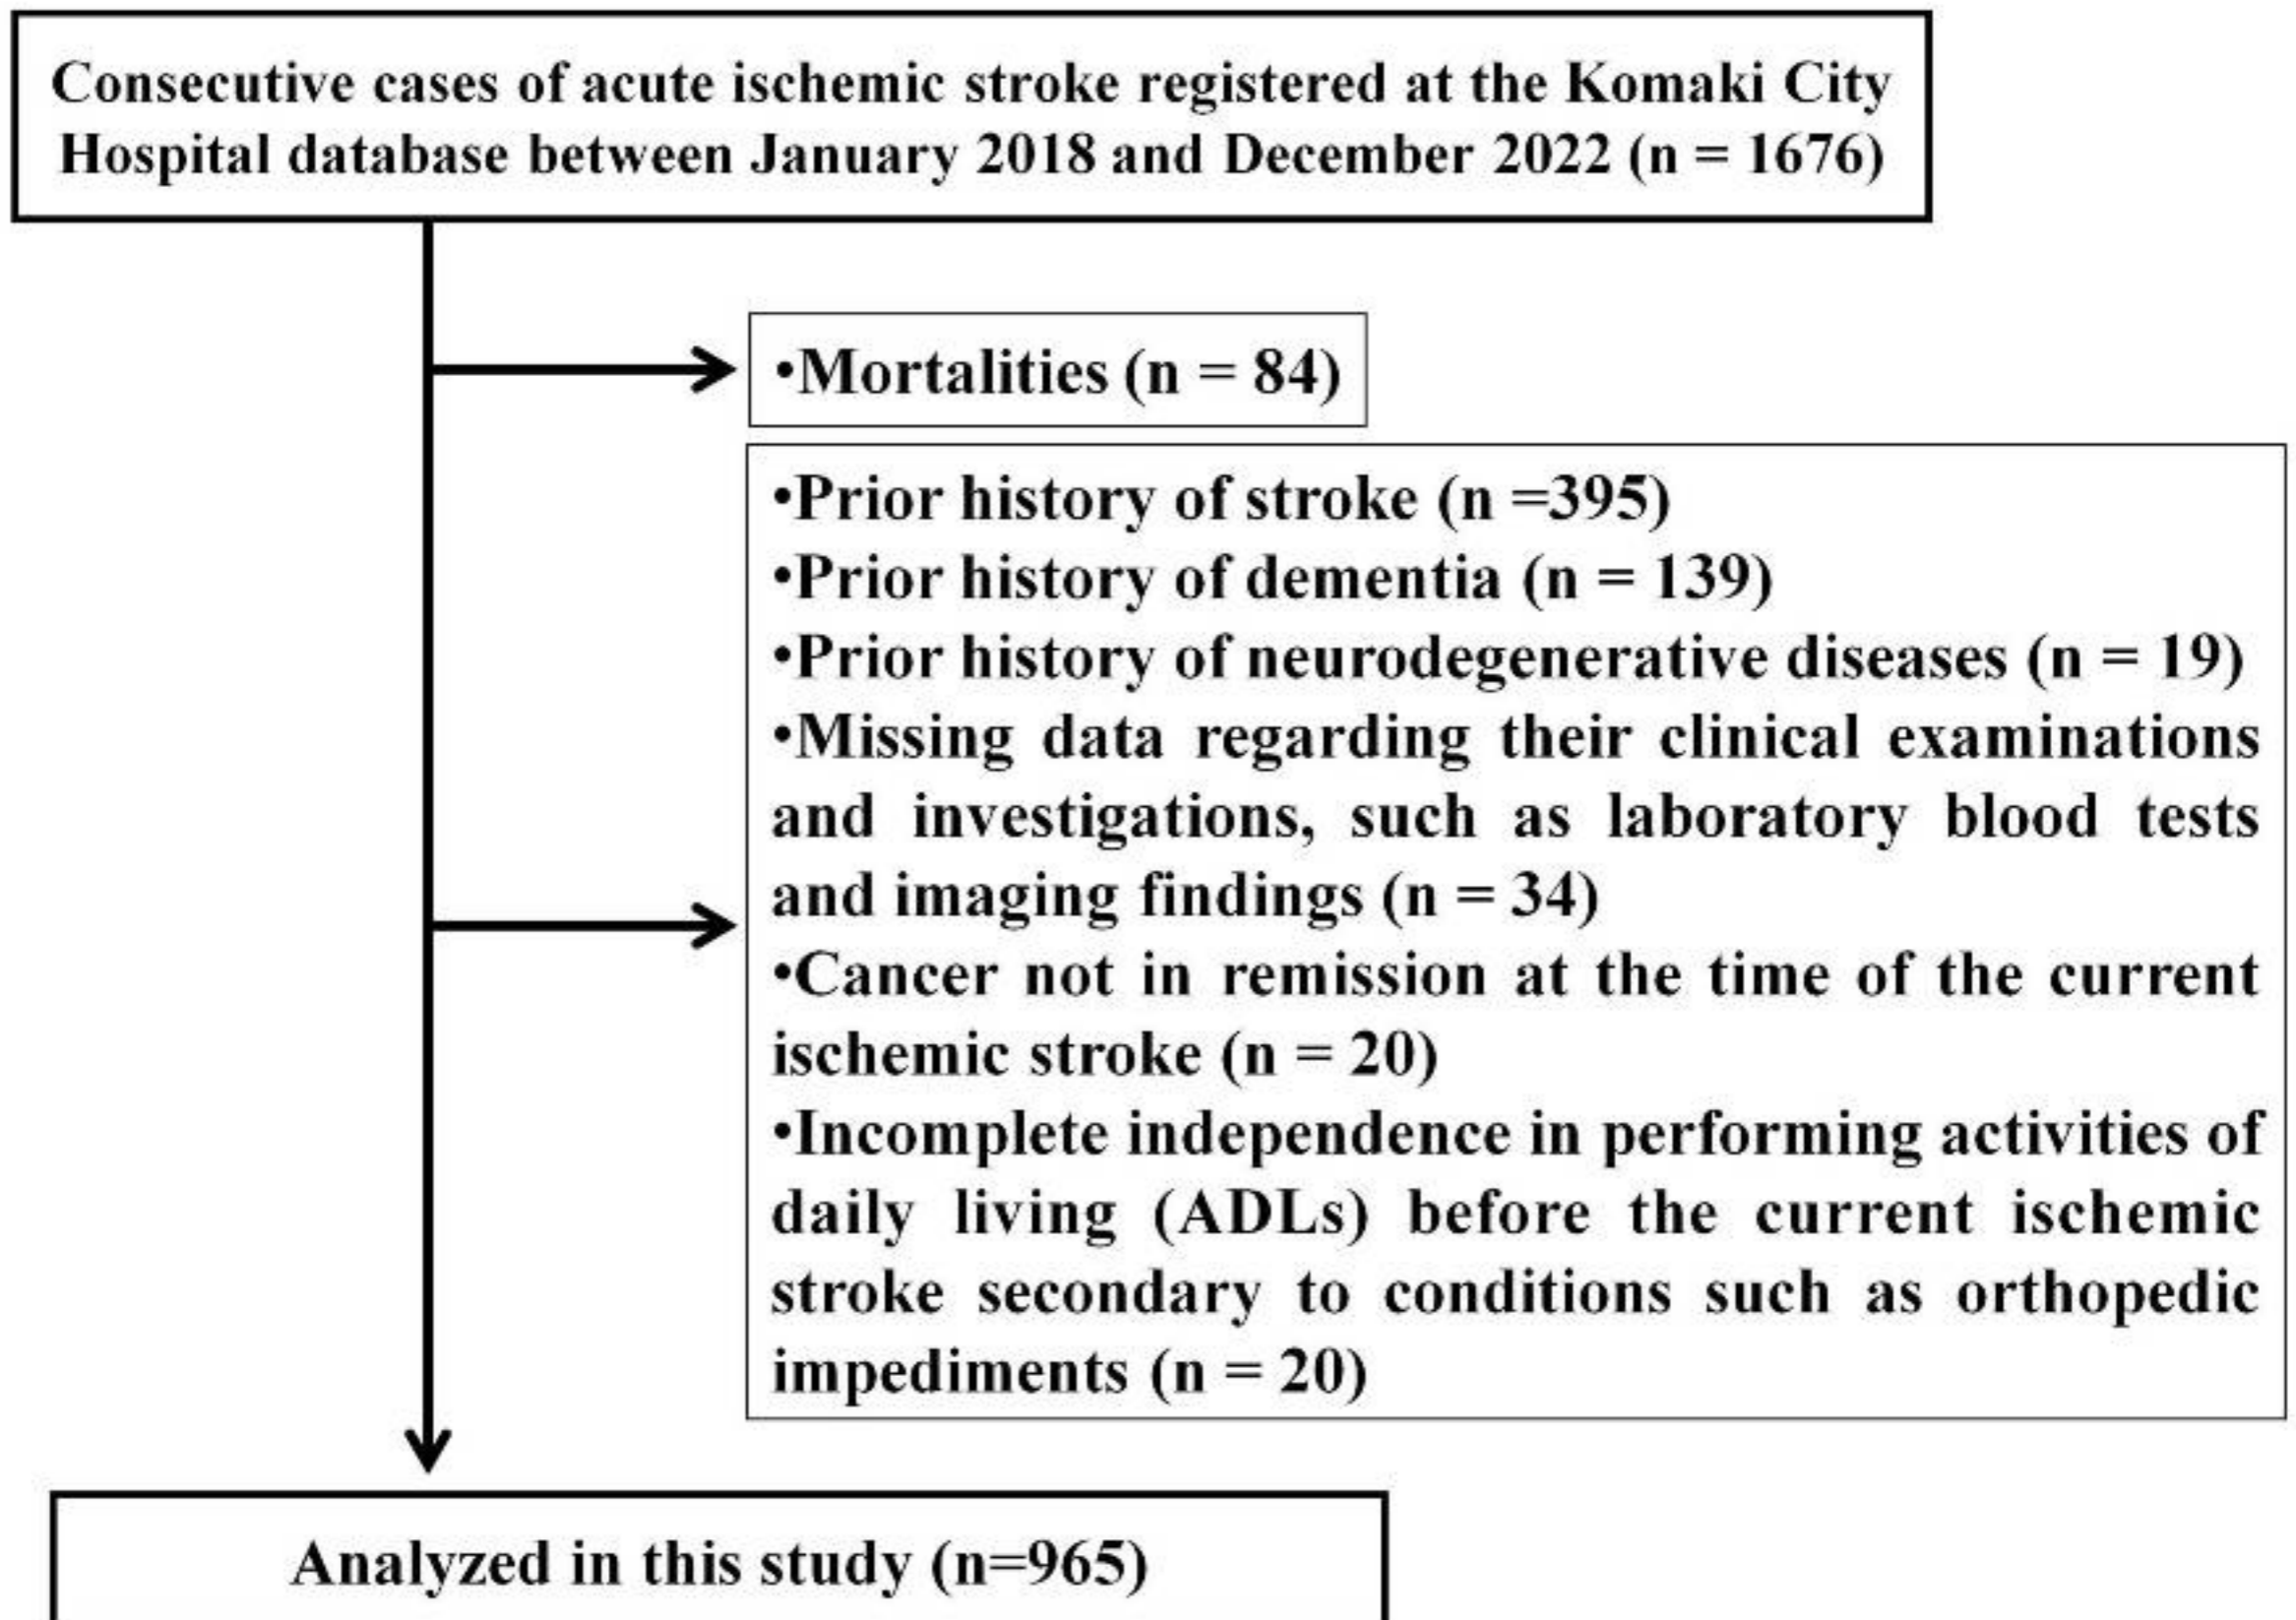

Source: https://medrxiv.org/content/10.1101/2023.10.04.23296576.full.pdf
